# Supplementary material
Source: PubMed Central journal article supplement (PMC8654111)
Supplement: NIHMS1758391-supplement-Supplementary_Material.pdf [file NIHMS1758391-supplement-Supplementary_Material.pdf]

## SUPPLEMENTARY METHODS

### *Test datasets*

Within long-billed hermits, only males in this species sing and crystallized songs appear after birds are about 6 months old. All included songs were crystallized songs. In the study population, relatedness is low even between individuals from the same lek (Araya-Salas et al. 2019) and is likely to be low among all individuals in our sample. We did not control for variation among individuals producing the same song type, as this made the dataset more realistic and provided a good test for our method.

We collected recordings of live budgerigars in a controlled laboratory environment. The individuals used for this study were acquired from a large breeding population and are assumed to have low relatedness. In order to promote calling during recording sessions, we played recordings of unfamiliar budgerigar vocalizations at low amplitudes and also ensured that isolated individuals were in visual contact with the flock mates. Calls were recorded during 30 min sessions that occurred twice per week using an Audio-Technica Pro 37 microphone input to a Dell DHMPC running Syrinx 2.6 (Burt 2006, [www.syrinxpc.com](http://www.syrinxpc.com)) with a 22.05 kHz sampling rate. Calls were automatically partitioned and saved to separate wav files by Syrinx.

To illustrate the manner in which songs and calls are used by budgerigars and long-billed hermits in natural settings, we have included spectrograms of vocal displays recorded from wild long-billed hermits and budgerigars that contain multiple elements (i.e., multiple songs or calls) in Fig. S1. Broadly speaking, long-billed hermit songs span a wider range of frequencies and have higher harmonic content than budgerigar calls, and the differences in the fundamental frequency contours of these signals are readily apparent when viewing spectrograms of recordings.

### *Synthetic data creation*

We varied the duration of synthetic sounds based on the distribution of durations of natural vocalizations in each species (Fig. S2). The natural vocalizations used as templates have very little harmonic content. Hence, harmonic content was simulated arbitrarily as frequency contours an octave (twice the frequency) and a fifth (2.5 times) above the dominant frequency contour. Variation in background noise was generated by adding normally distributed noise (i.e., white noise) to each signal. Allowing for different levels of harmonic content made it possible to simulate recordings with low levels of signal attenuation, such as those collected at close range, as well as recordings with high levels of attenuation, which could be caused by environmental factors such as habitat type, as well as recording conditions. Sample spectrograms of synthesized signals are shown in Fig. S3. Based on visual assessment of spectrograms of synthetic signals and their strong resemblance to spectrograms of the live bird recordings used for this study, as well as the parameters with which we designed the synthetic signals, we are confident that the synthetic signals closely resemble those of live birds. Thus, we expect that signals resembling the synthetic songs might be heard in nature.

By using simulated data with known classes, we were able to make better predictions about which signal characteristics or recording conditions are likely to affect performance while also avoiding the time-consuming collection of data from live animals. This approach of using synthetic data with known variation and class labels for every signal types is analogous to data augmentation in supervised machine learning. Data augmentation is a process in which labeled training data is slightly altered or modified in order to create additional annotated examples for training an algorithm, and is often employed when labeled data is scarce (Krizhevsky et al. 2012). Data augmentation has been shown to enhance performance of deep learning models in the classification of acoustic data (McFee et al. 2015, Salmon and Bello 2017). This approach may be particularly valuable when developing tools to help bioacoustics researchers in the analysis of field recordings because environmental conditions can alter acoustic structure in distinct ways through scattering, frequency-dependent attenuation and introduction of noise. Previous work has shown that creating synthetic datasets can improve performance of unsupervised random forests (Dalleau et al. 2018). In addition, this approach provides test sets with known attributes to evaluate performance of new methods. However, to our knowledge this technique has not been used to evaluate classification methods of animal vocalizations. The code for data synthesis used in this study is included in the appendix.

### *Feature measurements*

Acoustic features were selected with the aim of creating a general, reproducible framework using accessible, commonly used acoustic measurements. This included mel frequency cepstral coefficients (MFCCs; Lyon and Orduabadi 1982), which have been widely applied in the analysis of bioacoustic signals (reviewed in Stowell and Plumbley 2010). For each spectrogram, we calculated 25 MFCCs and their derivatives and extracted descriptive statistics (e.g., mean, median, and variance) from these values *sensu* Salamon et al. (2014), producing 179 MFCC measurements for each audio clip. We measured acoustic parameters using the `specan` function from R package `warbler` (Araya-Salas and Smith-Vidaurre 2017), which includes many of the same metrics provided by the `seewave` R package (Sueur et al. 2008) and `Raven Pro` (Center for Conservation Bioacoustics, 2019), and included peak frequency (i.e., frequency at which the highest power is present), bandwidth (i.e., frequency range of a signal), signal duration, and robust measurements based on energy distributions within the spectrogram. Recently, researchers have shown that incorporating parameters extracted directly from spectrogram images may facilitate high levels of classification accuracy for avian signals (Smith-Vidaurre et al. 2019); however, to ensure our approach is widely generalizable, we do not include such features here.

### *Supervised random forest analyses*

When using a supervised random forest approach, individual decision trees are constructed by splitting data into two classes at each node using a randomly selected feature measurement, with the goal of optimizing the split between labeled classes. Out-of-bag error is a metric that is commonly used to assess the ability of random forest models to distinguish between distinct classes. Out-of-bag error is calculated by iteratively removing a single sample and building a random forest model with the remaining data, and then testing whether that sample is classified to the same category as other samples from the same class.

### *Unsupervised random forest analyses*

Contrasting supervised random forest models, an unsupervised random forest uses unlabeled samples to create a collection of decision trees by optimally splitting the distribution of values for a randomly selected feature measurement at each node. This process enables unsupervised random forests to find groupings among similar samples and allows for measuring the degree of dissimilarity among all data points (Breiman 2001). This is possible with unlabeled data because decision trees assign all samples to end nodes, i.e., different classes, and one can then calculate the pairwise distance between samples within a data set as the proportion of times a pair of samples is classified in the same end node.

### SUPPLEMENTARY RESULTS

We evaluated the ability of our models to correctly classify similar elements together by comparing our results to the classification rates that would be expected by random chance. We calculated random chance of correct assignment as  $1/c$ , where  $c$  is the number of different classes. Note that to find statistical significance of observed correct classification rates versus those theoretically expected by chance one must adjust for a finite number of test data points (see Combrisson and Jerbi 2015). However, we use this value only as a point of reference for assessing supervised random forest performance. To evaluate the performance of our unsupervised method we use rigorous statistical testing, including calculating the acoustic space occupied by all signals in a dataset as well as the adjusted Rand index.

**Figure S1. Spectrograms showing examples of vocal displays recorded from wild birds. a)** long-billed hermit songs produced by the same individual, **b)** budgerigar calls produced by the same individual. Sounds were obtained from Xeno Canto ([www.xeno-canto.org](http://www.xeno-canto.org)).

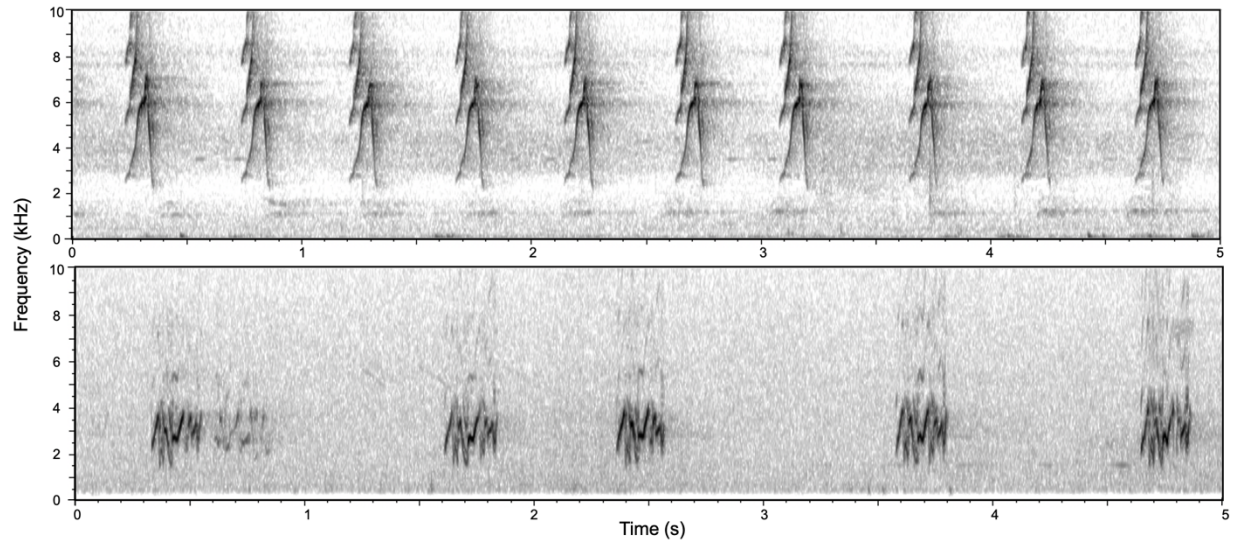

**Figure S2.** Histograms showing durations of a) field-recorded long-billed hermit songs, and b) lab-recorded budgerigar calls. Distributions of durations from live bird recordings were used to create synthetic datasets.

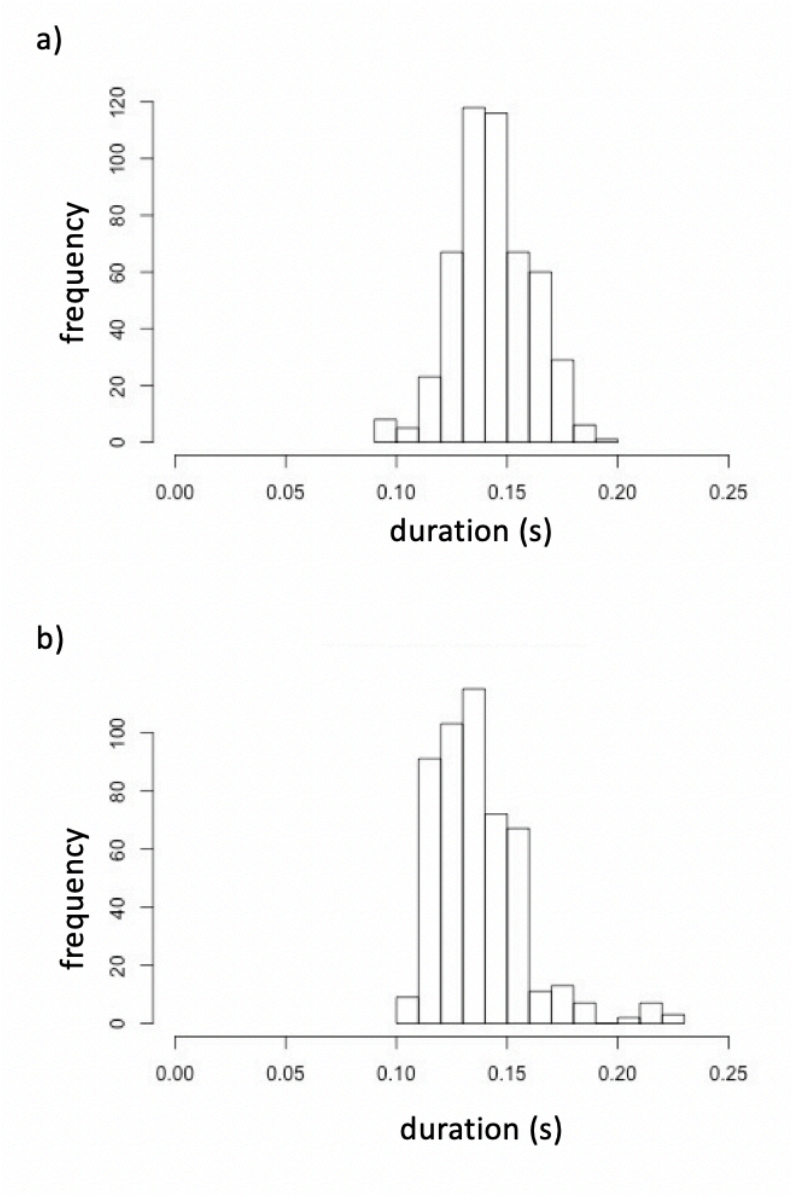

**Figure S3. Spectrograms showing examples of signals in test datasets. a) synthetic budgerigar calls, b) synthetic long-billed hermit songs. Spectrograms in the same row show different synthetic signals that are considered to be the same element type.**

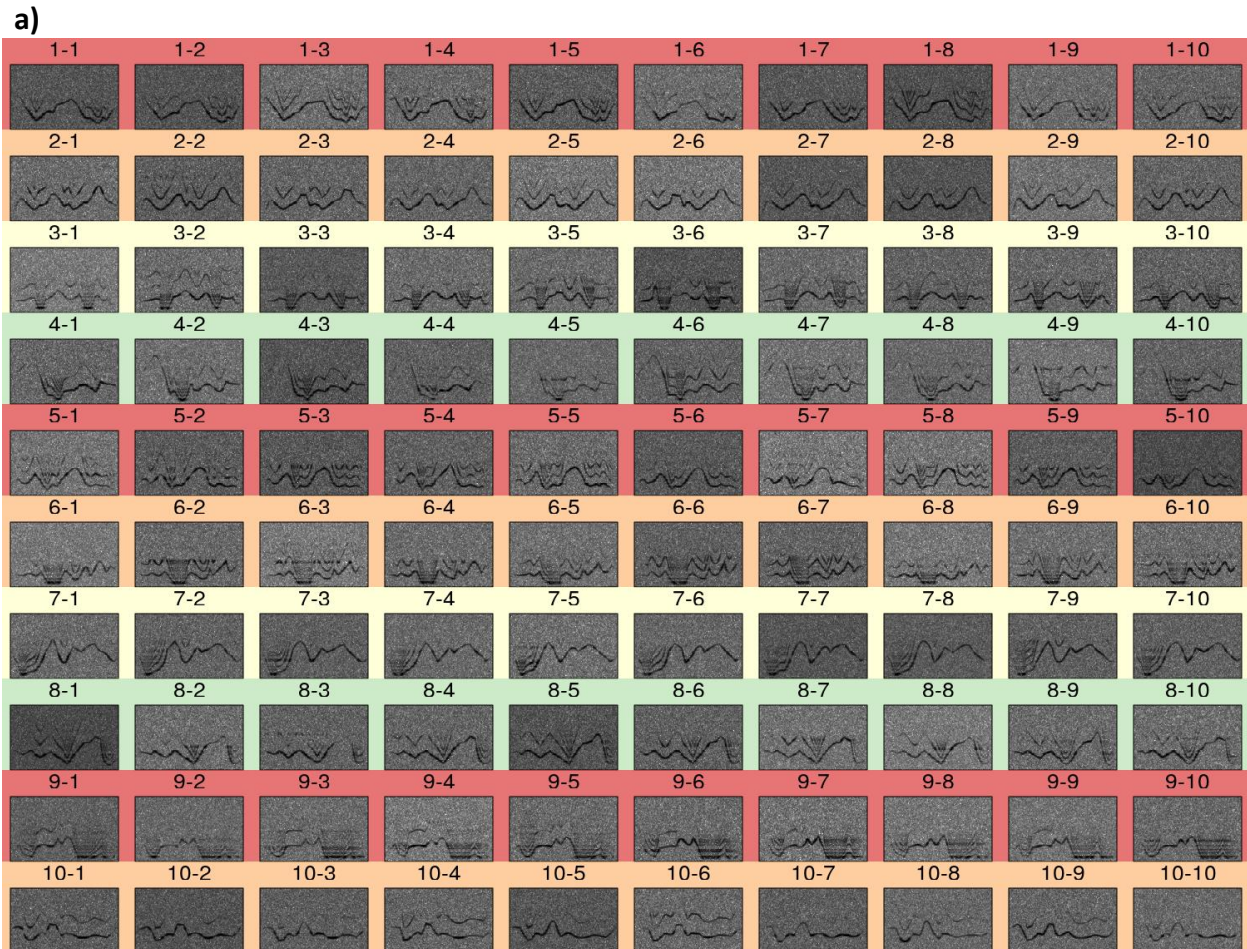

b)

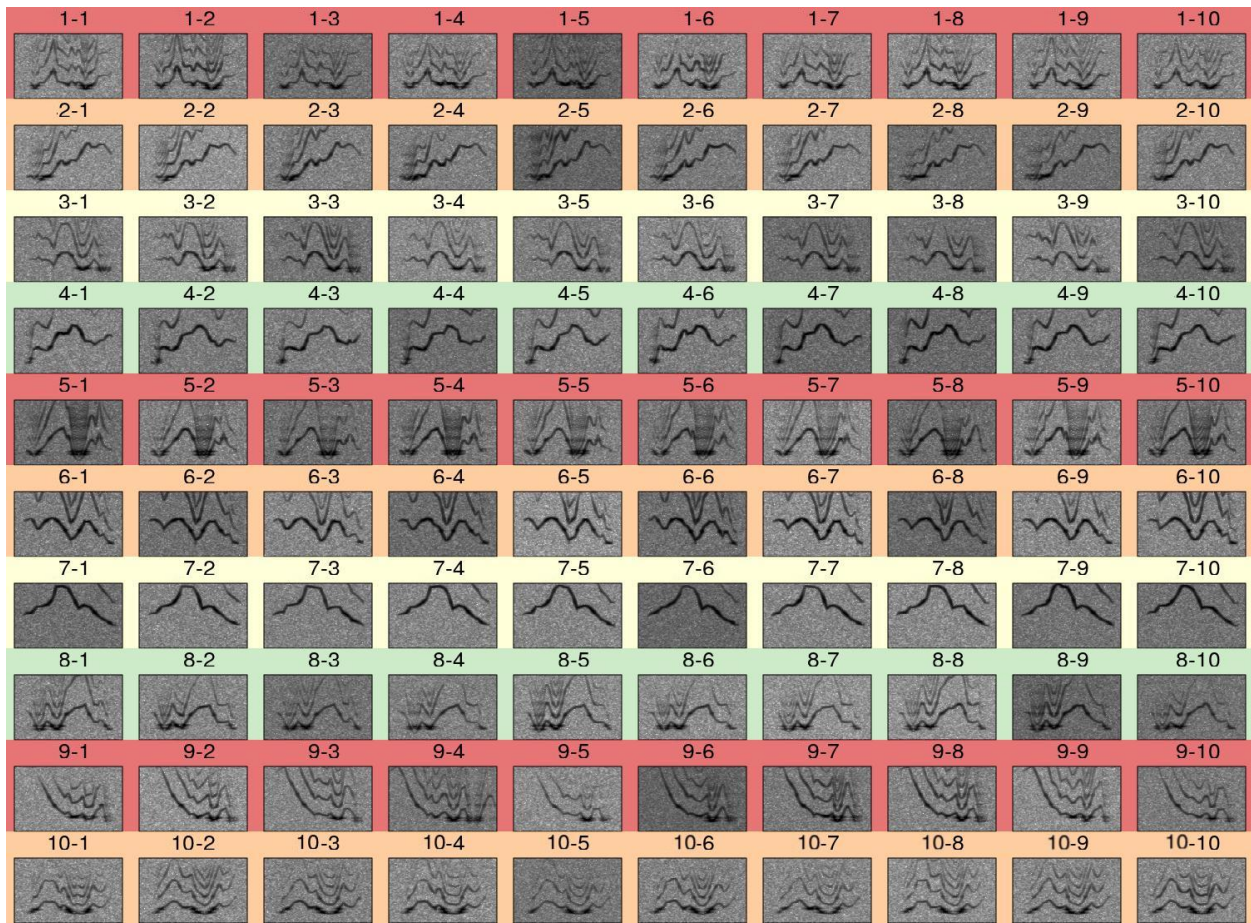

**Figure S4. Sample plots showing silhouette widths for different numbers of clusters applied to distance matrices obtained from unsupervised random forest models.** a) synthetic budgerigar dataset with 20 unique element types, b) synthetic long-billed hermit dataset with 20 unique element types, c) synthetic budgerigar dataset with 50 unique element types, d) synthetic long-billed hermit dataset with 50 unique element types, e) synthetic budgerigar dataset with 100 unique element types, f) synthetic long-billed hermit dataset with 100 unique element types, g) lab-recorded budgerigar dataset with 15 unique element types, h) field-recorded long-billed hermit dataset with 50 unique element types. Silhouette width is calculated as the ratio mean distance between points within a cluster to mean distance between clusters; the optimal number of clusters is typically determined to be that which results in the largest silhouette width. Blue and red dashed lines indicate true and estimated number of discrete elements in datasets, respectively. For synthetic datasets with large numbers of discrete elements, silhouette width is often high around the true number of discrete elements, and then increases again when high numbers of clusters are used. High silhouette values with very large numbers of clusters are likely due to overfitting, e.g., clusters created around very few data points.

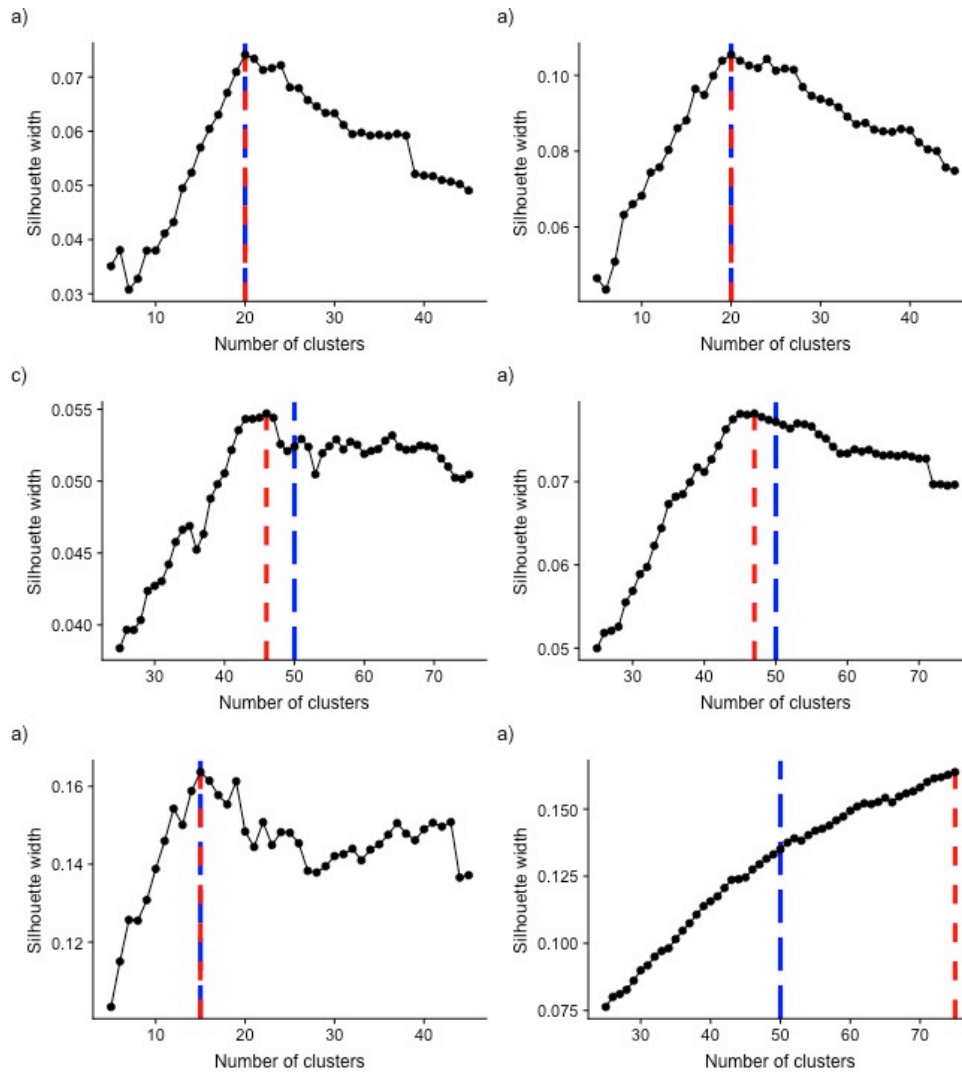



**Table S1.** Variable importance rankings indicating which feature measurements were most useful in splitting data into distinct classes were different for each of the four dataset types used for testing. Variable rankings were produced by the separate unsupervised random forest models created for each data set. Rankings shown for synthetic data were randomly selected from random forest models created for synthetic budgerigar and long-billed hermit data sets with 100 unique elements. Variable names are listed as they are referred to by the R packages warbleR and seawave and correspond to the feature measurements listed in the main text. The number of variables used varies between datasets because highly correlated measurements were removed before random forest models were created.

| <b>Variable ranking</b> | <b>Field-recorded long-billed hermit songs</b> | <b>Lab-recorded budgerigar calls</b> | <b>Synthetic long billed hermit songs</b> | <b>Synthetic budgerigar calls</b> |
|-------------------------|------------------------------------------------|--------------------------------------|-------------------------------------------|-----------------------------------|
| 1                       | var.cc23                                       | max.cc1                              | min.cc12                                  | max.cc13                          |
| 2                       | var.cc16                                       | xc.dim.1                             | median.cc9                                | mean.cc24                         |
| 3                       | var.cc24                                       | xc.dim.3                             | kurt.cc21                                 | kurt.cc25                         |
| 4                       | var.cc15                                       | xc.dim.2                             | kurt.cc16                                 | var.cc25                          |
| 5                       | var.cc22                                       | xc.dim.4                             | var.cc4                                   | var.cc8                           |
| 6                       | median.cc4                                     | xc.dim.5                             | max.cc23                                  | var.cc4                           |
| 7                       | var.cc14                                       | median.cc2                           | max.cc22                                  | var.cc22                          |
| 8                       | var.cc13                                       | time.ent                             | median.cc8                                | skew.cc2                          |
| 9                       | var.cc11                                       | freq.Q25                             | mean.cc23                                 | skew.cc22                         |
| 10                      | sfm                                            | freq.median                          | skew.cc8                                  | kurt.cc20                         |
| 11                      | entropy                                        | median.cc16                          | kurt.cc1                                  | kurt.cc23                         |
| 12                      | median.cc3                                     | time.Q75                             | kurt.cc19                                 | kurt.cc21                         |
| 13                      | median.cc5                                     | sfm                                  | var.cc22                                  | skew.cc20                         |
| 14                      | dtw.dim.1                                      | min.cc2                              | skew.cc7                                  | freq.IQR                          |
| 15                      | var.cc9                                        | kurt.cc7                             | max.cc21                                  | time.Q25                          |
| 16                      | kurt.cc15                                      | var.cc1                              | min.cc9                                   | maxdom                            |
| 17                      | min.cc15                                       | median.cc3                           | time.median                               | xc.dim.4                          |
| 18                      | skew.cc4                                       | var.cc7                              | dtw.dim.3                                 | var.cc6                           |
| 19                      | var.cc10                                       | median.cc7                           | max.cc19                                  | var.cc18                          |
| 20                      | mean.cc6                                       | dtw.dim.1                            | kurt.cc11                                 | var.cc19                          |
| 21                      | kurt.cc14                                      | var.cc5                              | skew.cc22                                 | var.cc5                           |
| 22                      | mean.cc15                                      | var.cc4                              | kurt.cc2                                  | mean.cc22                         |
| 23                      | freq.IQR                                       | time.IQR                             | var.cc3                                   | median.cc15                       |
| 24                      | max.cc14                                       | time.median                          | median.cc13                               | skew.cc19                         |
| 25                      | skew.cc15                                      | var.cc10                             | var.cc8                                   | skew.cc25                         |
| 26                      | var.cc25                                       | entropy                              | kurt.cc20                                 | var.cc15                          |
| 27                      | max.cc13                                       | freq.Q75                             | mean.cc18                                 | max.cc15                          |
| 28                      | mean.cc14                                      | skew.cc1                             | var.cc25                                  | max.cc20                          |

|    |             |             |             |             |
|----|-------------|-------------|-------------|-------------|
| 29 | max.cc16    | sd          | max.cc24    | median.cc13 |
| 30 | skew.cc14   | median.cc6  | max.cc8     | var.cc23    |
| 31 | min.cc14    | var.cc6     | max.cc14    | var.cc17    |
| 32 | max.cc15    | time.Q25    | kurt.cc17   | kurt.cc8    |
| 33 | var.cc21    | max.cc3     | skew.cc6    | var.cc20    |
| 34 | min.cc10    | dtw.dim.4   | skew.cc1    | var.cc14    |
| 35 | max.cc11    | dtw.dim.5   | skew.cc10   | mean.cc11   |
| 36 | modindx     | skew.cc2    | var.cc16    | median.cc7  |
| 37 | skew.cc18   | median.cc5  | median.cc24 | max.cc25    |
| 38 | min.cc3     | var.cc9     | var.cc23    | max.cc11    |
| 39 | min.cc6     | var.cc3     | var.cc13    | max.cc3     |
| 40 | median.cc7  | median.cc15 | max.cc20    | min.cc11    |
| 41 | skew.cc10   | skew.cc6    | max.cc9     | min.cc24    |
| 42 | skew.cc16   | max.cc5     | max.cc15    | min.cc15    |
| 43 | kurt.cc16   | skew.cc3    | xc.dim.4    | max.cc4     |
| 44 | max.cc3     | mean.cc5    | min.cc10    | max.cc5     |
| 45 | max.cc5     | median.cc9  | max.cc3     | min.cc19    |
| 46 | time.ent    | skew.cc5    | min.cc15    | min.cc25    |
| 47 | var.cc19    | skew.cc8    | xc.dim.2    | min.cc22    |
| 48 | skew.cc13   | min.cc3     | sfm         | min.cc18    |
| 49 | skew.cc9    | kurt.cc6    | dtw.dim.1   | min.cc1     |
| 50 | time.Q75    | kurt.cc4    | min.cc19    | xc.dim.2    |
| 51 | var.cc17    | var.cc8     | sp.ent      | xc.dim.3    |
| 52 | time.median | median.cc11 | mindom      | min.cc13    |
| 53 | max.cc19    | kurt        | min.cc8     | var.cc10    |
| 54 | min.cc16    | kurt.cc1    | max.cc10    | mean.cc23   |
| 55 | var.cc8     | median.cc17 | median.cc2  | kurt.cc19   |
| 56 | mean.cc10   | var.cc12    | mean.cc6    | skew.cc13   |
| 57 | max.cc10    | skew.cc4    | var.cc24    | var.cc13    |
| 58 | var.cc18    | kurt.cc3    | median.cc22 | median.cc19 |
| 59 | mean.cc9    | min.cc4     | skew.cc20   | median.cc9  |
| 60 | kurt.cc11   | min.cc6     | skew.cc18   | median.cc10 |
| 61 | max.cc23    | median.cc10 | var.cc9     | max.cc23    |
| 62 | var.cc6     | skew.cc7    | skew.cc11   | median.cc12 |
| 63 | max.cc18    | max.cc9     | skew.cc3    | median.cc8  |
| 64 | kurt.cc13   | var.cc11    | max.cc25    | max.cc16    |
| 65 | kurt.cc7    | median.cc18 | max.cc16    | max.cc17    |
| 66 | kurt.cc4    | var.cc2     | median.cc5  | min.cc12    |
| 67 | median.cc15 | min.cc7     | min.cc25    | min.cc9     |

|     |             |             |            |             |
|-----|-------------|-------------|------------|-------------|
| 68  | min.cc9     | kurt.cc8    | min.cc23   | min.cc7     |
| 69  | var.cc12    | median.cc20 | min.cc21   | min.cc21    |
| 70  | skew.cc11   | meanpeakf   | min.cc11   | min.cc23    |
| 71  | median.cc14 | var.cc24    | min.cc4    | max.cc1     |
| 72  | skew.cc3    | kurt.cc5    | dfrange    | max.cc2     |
| 73  | median.cc11 | modindx     | modindx    | min.cc8     |
| 74  | var.cc7     | median.cc19 | xc.dim.5   | min.cc2     |
| 75  | median.cc13 | max.cc2     | min.cc6    | dtw.dim.1   |
| 76  | min.cc4     | var.cc13    | dtw.dim.5  | dtw.dim.3   |
| 77  | min.cc24    | max.cc7     | min.cc2    | median.cc21 |
| 78  | median.cc2  | min.cc8     | max.cc7    | skew.cc10   |
| 79  | min.cc5     | var.cc25    | var.cc14   | kurt.cc17   |
| 80  | median.cc18 | mean.cc12   | kurt.cc14  | kurt.cc16   |
| 81  | skew.cc19   | median.cc8  | mean.d2.cc | skew.cc5    |
| 82  | max.cc8     | median.cc4  | kurt.cc25  | var.cc16    |
| 83  | skew.cc17   | median.cc21 | kurt.cc3   | mean.cc16   |
| 84  | xc.dim.2    | dtw.dim.2   | kurt.cc4   | median.cc18 |
| 85  | mean.cc8    | var.cc16    | skew.cc17  | median.cc6  |
| 86  | var.cc20    | min.cc1     | var.cc17   | max.cc12    |
| 87  | skew.cc5    | max.cc4     | var.cc6    | var.cc12    |
| 88  | min.cc22    | min.cc16    | mean.cc11  | median.cc17 |
| 89  | skew.cc7    | min.cc11    | var.cc12   | max.cc19    |
| 90  | var.cc3     | min.cc5     | skew.cc14  | median.cc3  |
| 91  | kurt.cc10   | median.cc13 | skew.cc5   | skew.cc6    |
| 92  | max.cc4     | freq.IQR    | skew.cc24  | var.cc2     |
| 93  | min.cc18    | dtw.dim.3   | kurt.cc24  | median.cc5  |
| 94  | dtw.dim.2   | max.cc12    | kurt.cc23  | skew.cc4    |
| 95  | min.cc2     | kurt.cc2    | kurt.cc22  | max.cc22    |
| 96  | min.cc12    | max.cc15    | skew.cc23  | max.cc18    |
| 97  | median.cc21 | max.cc10    | skew.cc21  | var.cc1     |
| 98  | time.Q25    | kurt.cc9    | kurt.cc13  | max.cc14    |
| 99  | meanpeakf   | max.cc6     | skew.cc25  | var.cc7     |
| 100 | mindom      | max.cc21    | kurt.cc18  | skew.cc3    |
| 101 | kurt.cc3    | min.cc20    | kurt.cc9   | kurt.cc13   |
| 102 | median.cc23 | max.cc8     | kurt.cc15  | kurt.cc24   |
| 103 | min.cc23    | var.cc15    | kurt.cc7   | kurt.cc22   |
| 104 | var.cc1     | var.cc22    | kurt.cc5   | skew.cc15   |
| 105 | startdom    | skew.cc19   | kurt.cc12  | var.cc21    |
| 106 | kurt.cc23   | max.cc19    | skew.cc15  | skew.cc7    |

|     |             |             |             |             |
|-----|-------------|-------------|-------------|-------------|
| 107 | min.cc7     | skew.cc9    | kurt.cc10   | skew.cc12   |
| 108 | kurt.cc8    | var.cc14    | kurt.cc8    | skew.cc11   |
| 109 | max.cc24    | median.cc14 | skew.cc2    | skew.cc23   |
| 110 | kurt.cc22   | var.cc23    | skew.cc12   | kurt.cc6    |
| 111 | kurt.cc9    | maxdom      | var.cc11    | kurt.cc2    |
| 112 | max.cc17    | median.cc22 | mean.cc10   | skew.cc21   |
| 113 | median.cc16 | skew.cc20   | var.cc5     | kurt.cc1    |
| 114 | max.cc9     | var.cc20    | mean.cc4    | skew.cc16   |
| 115 | max.cc21    | max.cc22    | median.cc16 | kurt.cc10   |
| 116 | min.cc13    | max.cc14    | median.cc12 | kurt.cc4    |
| 117 | var.cc5     | median.cc23 | median.cc17 | kurt.cc15   |
| 118 | min.cc20    | kurt.cc10   | var.cc21    | kurt.cc14   |
| 119 | skew.cc6    | kurt.cc11   | var.cc15    | kurt.cc5    |
| 120 | median.cc12 | min.cc9     | var.cc18    | skew.cc14   |
| 121 | var.cc4     | var.cc17    | var.cc7     | skew.cc18   |
| 122 | dtw.dim.5   | skew.cc10   | mean.cc7    | skew.cc24   |
| 123 | max.cc22    | kurt.cc25   | median.cc25 | kurt.cc3    |
| 124 | max.cc1     | min.cc13    | var.cc2     | kurt.cc12   |
| 125 | max.cc2     | var.cc21    | mean.cc2    | kurt.cc9    |
| 126 | skew.cc2    | kurt.cc12   | mean.cc15   | kurt.cc7    |
| 127 | median.cc24 | skew.cc11   | median.cc21 | kurt.cc18   |
| 128 | skew.cc22   | max.cc16    | var.cc20    | skew.cc17   |
| 129 | min.cc21    | min.cc19    | skew.cc4    | skew.cc1    |
| 130 | skew.cc21   | mean.cc24   | skew.cc9    | var.cc9     |
| 131 | mean.cc25   | min.cc10    | skew.cc16   | mean.cc15   |
| 132 | var.cc2     | max.cc11    | kurt.cc6    | max.cc24    |
| 133 | maxdom      | max.cc13    | skew.cc19   | max.cc9     |
| 134 | xc.dim.4    | min.cc18    | skew.cc13   | min.cc17    |
| 135 | kurt        | max.cc23    | var.cc10    | min.cc6     |
| 136 | min.cc17    | var.cc18    | mean.cc19   | meanpeakf   |
| 137 | max.cc7     | var.cc19    | median.cc14 | startdom    |
| 138 | kurt.cc21   | dfrange     | max.cc17    | meandom     |
| 139 | max.cc6     | min.cc12    | max.cc12    | sfm         |
| 140 | dfrange     | min.cc21    | max.cc1     | time.Q75    |
| 141 | min.cc19    | skew.cc12   | min.cc14    | mindom      |
| 142 | min.cc11    | min.cc22    | meanpeakf   | time.ent    |
| 143 | median.cc22 | max.cc20    | kurt        | kurt        |
| 144 | dtw.dim.3   | max.cc17    | freq.IQR    | time.median |
| 145 | median.cc19 | skew.cc18   | freq.Q75    | freq.Q25    |

|     |             |             |             |             |
|-----|-------------|-------------|-------------|-------------|
| 146 | skew.cc20   | startdom    | duration    | freq.median |
| 147 | median.cc20 | skew.cc21   | sd          | freq.Q75    |
| 148 | dfslope     | kurt.cc13   | time.ent    | xc.dim.1    |
| 149 | kurt.cc6    | min.cc14    | time.Q25    | min.cc20    |
| 150 | skew.cc1    | kurt.cc19   | min.cc5     | median.cc20 |
| 151 | xc.dim.1    | kurt.cc20   | min.cc7     | var.cc24    |
| 152 | max.cc25    | kurt.cc14   | min.cc17    | skew.cc8    |
| 153 | kurt.cc24   | skew.cc22   | max.cc5     | var.cc11    |
| 154 | skew.cc12   | min.cc24    | min.cc22    | median.cc14 |
| 155 | min.cc8     | min.cc15    | max.cc11    | median.cc4  |
| 156 | dtw.dim.4   | kurt.cc22   | max.cc4     | max.cc21    |
| 157 | skew.cc8    | max.cc18    | max.cc6     | max.cc10    |
| 158 | skew.cc23   | skew.cc17   | max.cc13    | max.cc8     |
| 159 | max.cc20    | skew.cc15   | min.cc20    | max.cc7     |
| 160 | kurt.cc12   | kurt.cc23   | min.cc13    | max.cc6     |
| 161 | kurt.cc18   | min.cc25    | min.cc18    | min.cc10    |
| 162 | median.cc17 | dfslope     | startdom    | min.cc4     |
| 163 | skew.cc24   | median.cc25 | xc.dim.3    | xc.dim.5    |
| 164 | xc.dim.3    | skew.cc16   | dtw.dim.4   | dtw.dim.4   |
| 165 | kurt.cc1    | skew.cc14   | xc.dim.1    | dtw.dim.5   |
| 166 | kurt.cc17   | skew.cc13   | time.Q75    | min.cc5     |
| 167 | kurt.cc5    | max.cc24    | maxdom      | min.cc3     |
| 168 | kurt.cc19   | min.cc23    | enddom      | dtw.dim.2   |
| 169 | max.cc12    | kurt.cc16   | time.IQR    | dfslope     |
| 170 | min.cc25    | min.cc17    | dfslope     | modindx     |
| 171 | xc.dim.5    | max.cc25    | dtw.dim.2   | time.IQR    |
| 172 | kurt.cc2    | skew.cc23   | min.cc16    | enddom      |
| 173 | skew.cc25   | kurt.cc17   | max.cc18    | min.cc14    |
| 174 | enddom      | kurt.cc24   | min.cc24    | median.cc25 |
| 175 | kurt.cc20   | kurt.cc15   | var.cc19    | min.cc16    |
| 176 | kurt.cc25   | kurt.cc18   | median.cc20 | skew.cc9    |
| 177 |             | skew.cc25   |             | kurt.cc11   |
| 178 |             | kurt.cc21   |             | var.cc3     |
| 179 |             | mindom      |             | elm.type    |
| 180 |             | skew.cc24   |             | sd          |
| 181 |             | enddom      |             | duration    |

## WORKS CITED

- Araya-Salas, M., & Smith-Vidaurre, G. (2017). warbleR: an R package to streamline analysis of animal acoustic signals. *Methods in Ecology and Evolution*, 8(2), 184-191.
- Araya-Salas M, Smith-Vidaurre G, Mennill DJ, González-Gómez PL, Cahill J, Wright TF. (2019). Social group signatures in hummingbird displays provide evidence of co-occurrence of vocal and visual learning. *Proceedings of the Royal Society B: Biological Sciences* 286:20190666.
- Breiman, L. (2001). Random forests. *Machine learning*, 45(1), 5-32.
- Combrisson, E., & Jerbi, K. (2015). Exceeding chance level by chance: The caveat of theoretical chance levels in brain signal classification and statistical assessment of decoding accuracy. *Journal of neuroscience methods*, 250: 126-136.
- Dalleau, K., Couceiro, M., & Smaïl-Tabbone, M. (2018). Unsupervised extremely randomized trees. In *Pacific-Asia Conference on Knowledge Discovery and Data Mining*, Springer, Cham, 2018.
- Krizhevsky, A., Sutskever, I., & Hinton, G. E. (2012). Imagenet classification with deep convolutional neural networks. In *Advances in neural information processing systems*, pp. 1097-1105.
- Lyon, R. H., & Ordubadı, A. (1982). Use of cepstra in acoustical signal analysis.
- McFee, B., E. Humphrey, and J. Bello. (2015). A software framework for musical data augmentation. In *16th International Society for Music Information Retrieval Conference*, pp. 248–254.
- Raven Pro 1.6.1. Center for Conservation Bioacoustics. (2019). Raven Pro: Interactive Sound Analysis Software (Version 1.6.1) [Computer software]. Ithaca, NY: The Cornell Lab of Ornithology. Available from <http://ravensoundsoftware.com/>.
- Salamon, J., Rocha, B., & Gómez, E. (2012, March). Musical genre classification using melody features extracted from polyphonic music signals. In *2012 IEEE International Conference on Acoustics, Speech and Signal Processing (ICASSP)* (pp. 81-84). IEEE.
- Salamon, J., & Bello, J. P. (2017). Deep convolutional neural networks and data augmentation for environmental sound classification. *IEEE Signal Processing Letters*, 24: 279-283.
- Sueur, J., Aubin, T., & Simonis, C. (2008). Seewave, a free modular tool for sound analysis and synthesis. *Bioacoustics*, 18(2), 213-226.
- Smith-Vidaurre, G., Araya-Salas, M., & Wright, T. F. (2019). Individual signatures outweigh social group identity in contact calls of a communally nesting parrot. *Behavioral Ecology*.

Stowell, D., & Plumbley, M. D. (2010). Birdsong and C4DM: A survey of UK birdsong and machine recognition for music researchers. *Centre for Digital Music, Queen Mary University of London, Tech. Rep. C4DM-TR-09-12.*
